# Supplementary material for: Single mutations in the ε subunit from thermophilic Bacillus PS3 generate a high binding affinity site for ATP
Source: PeerJ journal article supplement (doi:10.7717/peerj.5505), 2018-09-05
Supplement: SI_ps3-R103A-R115A_R1.pdf [file SI_ps3-R103A-R115A_R1.pdf]

# Supporting Information

## Single mutations in the $\epsilon$ subunit from thermophilic *Bacillus* PS3 generate a high binding affinity site for ATP

Alexander Krahl<sup>1,2\*</sup> and Peter J. Bond<sup>3,4</sup>

<sup>1</sup>School of Computational Sciences, Korea Institute for Advanced Study, 85 Hoegiro, Dongdaemun-gu, Seoul 02455, Republic of Korea

<sup>2</sup>Department of Biophysics, Graduate School of Science, Kyoto University, Kitashirakawa-Oiwakecho, Sakyo-ku, Kyoto, 606-8502, Japan

<sup>3</sup>Bioinformatics Institute, Agency for Science, Technology and Research (A\*STAR), 30 Biopolis Str., #07-01 Matrix, Singapore 138671

<sup>4</sup>National University of Singapore, Department of Biological Sciences, 14 Science Drive 4, Singapore 117543

Table S1: Backbone RMSD of both helical domains in Å if ATP coordinates  $Mg^{2+}$  with the  $O\alpha$  and  $O\beta$  atoms.

|                | Wild type   |                       |                       | R103A/R115A |                       |                       |
|----------------|-------------|-----------------------|-----------------------|-------------|-----------------------|-----------------------|
|                | whole       | 1 <sup>st</sup> helix | 2 <sup>nd</sup> helix | whole       | 1 <sup>st</sup> helix | 2 <sup>nd</sup> helix |
| <b>Run 1</b>   | 1.1 +/- 0.3 | 1.1 +/- 0.3           | 1.4 +/- 0.3           | 1.3 +/- 0.3 | 1.3 +/- 0.3           | 1.7 +/- 0.5           |
| <b>Run 2</b>   | 1.6 +/- 0.4 | 1.6 +/- 0.5           | 1.8 +/- 0.6           | 1.2 +/- 0.3 | 1.2 +/- 0.3           | 1.6 +/- 0.3           |
| <b>Run 3</b>   | 1.2 +/- 0.4 | 1.2 +/- 0.3           | 1.4 +/- 0.4           | 1.4 +/- 0.4 | 1.4 +/- 0.5           | 1.0 +/- 0.3           |
| <b>Average</b> | 1.3 +/- 0.3 | 1.3 +/- 0.3           | 1.5 +/- 0.2           | 1.3 +/- 0.1 | 1.3 +/- 0.1           | 1.4 +/- 0.4           |

|                | R103A       |                       |                       | R115A       |                       |                       |
|----------------|-------------|-----------------------|-----------------------|-------------|-----------------------|-----------------------|
|                | whole       | 1 <sup>st</sup> helix | 2 <sup>nd</sup> helix | whole       | 1 <sup>st</sup> helix | 2 <sup>nd</sup> helix |
| <b>Run 1</b>   | 1.3 +/- 0.3 | 1.3 +/- 0.3           | 1.6 +/- 0.5           | 2.4 +/- 0.5 | 2.5 +/- 0.5           | 1.5 +/- 0.3           |
| <b>Run 2</b>   | 1.2 +/- 0.3 | 1.2 +/- 0.3           | 1.4 +/- 0.3           | 1.4 +/- 0.3 | 1.4 +/- 0.3           | 1.5 +/- 0.5           |
| <b>Run 3</b>   | 1.6 +/- 0.3 | 1.7 +/- 0.4           | 2.1 +/- 0.6           | 0.9 +/- 0.2 | 0.9 +/- 0.3           | 1.4 +/- 0.3           |
| <b>Average</b> | 1.4 +/- 0.2 | 1.4 +/- 0.3           | 1.7 +/- 0.4           | 1.6 +/- 0.7 | 1.6 +/- 0.8           | 1.5 +/- 0.06          |

Table S2: Center of mass (COM) distances of the  $\alpha$ -helical domains in Å if ATP coordinates  $Mg^{2+}$  with the  $O\alpha$  and  $O\beta$  atoms. Average distance and standard deviation for this distance was derived by using runs 1 to 3.

| <b>COM distance [Å]</b> | <b>Wild type</b> | <b>R103A</b> | <b>R115A</b> | <b>R103A/R115A</b> |
|-------------------------|------------------|--------------|--------------|--------------------|
| <b>Run 1</b>            | 8.7 +/- 0.3      | 8.5 +/- 0.3  | 9.0 +/- 0.3  | 8.9 +/- 0.3        |
| <b>Run 2</b>            | 8.6 +/- 0.4      | 9.0 +/- 0.2  | 9.2 +/- 0.3  | 9.0 +/- 0.3        |
| <b>Run 3</b>            | 8.8 +/- 0.3      | 8.8 +/- 0.4  | 8.9 +/- 0.3  | 9.0 +/- 0.3        |
| <b>Average</b>          | 8.7 +/- 0.1      | 8.8 +/- 0.3  | 9.0 +/- 0.2  | 9.0 +/- 0.06       |

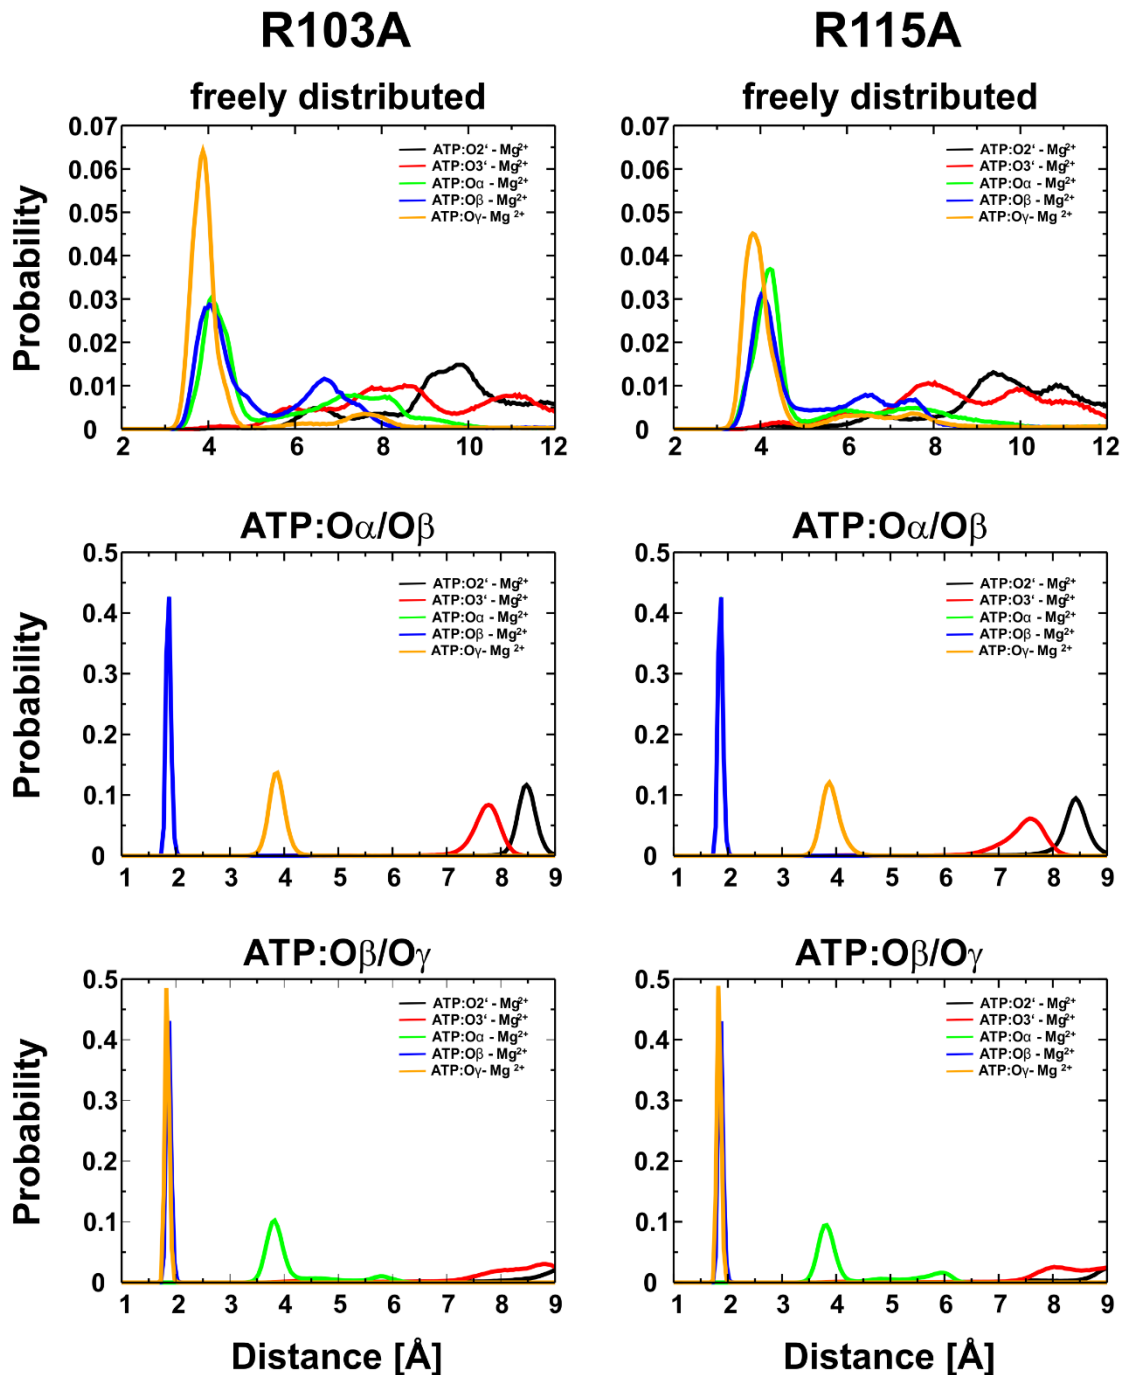

Figure S1: Distance of the Mg<sup>2+</sup> to ATP oxygen atoms, when ATP is bound to the  $\epsilon$  subunit from thermophilic *Bacillus* PS3 mutants (R103A and R115A). The top graphs show how Mg<sup>2+</sup> binds to these oxygen atoms, when the ion is freely distributed. The middle and bottom graphs show the distance distributions, when Mg<sup>2+</sup> is bound to ATP:O $\alpha$ /O $\beta$  or ATP:O $\beta$ /O $\gamma$ , respectively. It should be noted that two histograms (Mg<sup>2+</sup> - ATP:O $\alpha$  and Mg<sup>2+</sup> - ATP:O $\beta$ ) are overlaid if Mg<sup>2+</sup> is coordinated to ATP:O $\alpha$ /O $\beta$  (middle row). The results for the R103A and R115A mutants are shown in the left and right columns, respectively.

## R103A - ATP:O $\alpha$ /O $\beta$

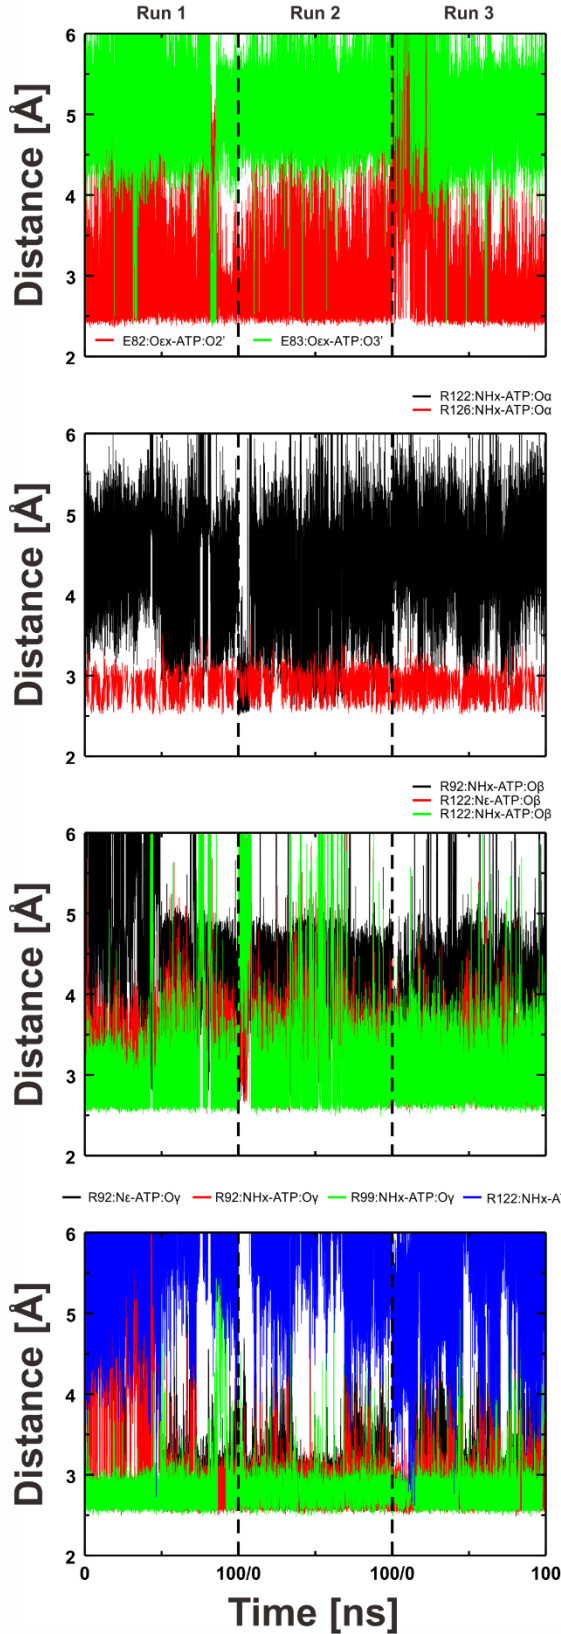

## R103A - ATP:O $\beta$ /O $\gamma$

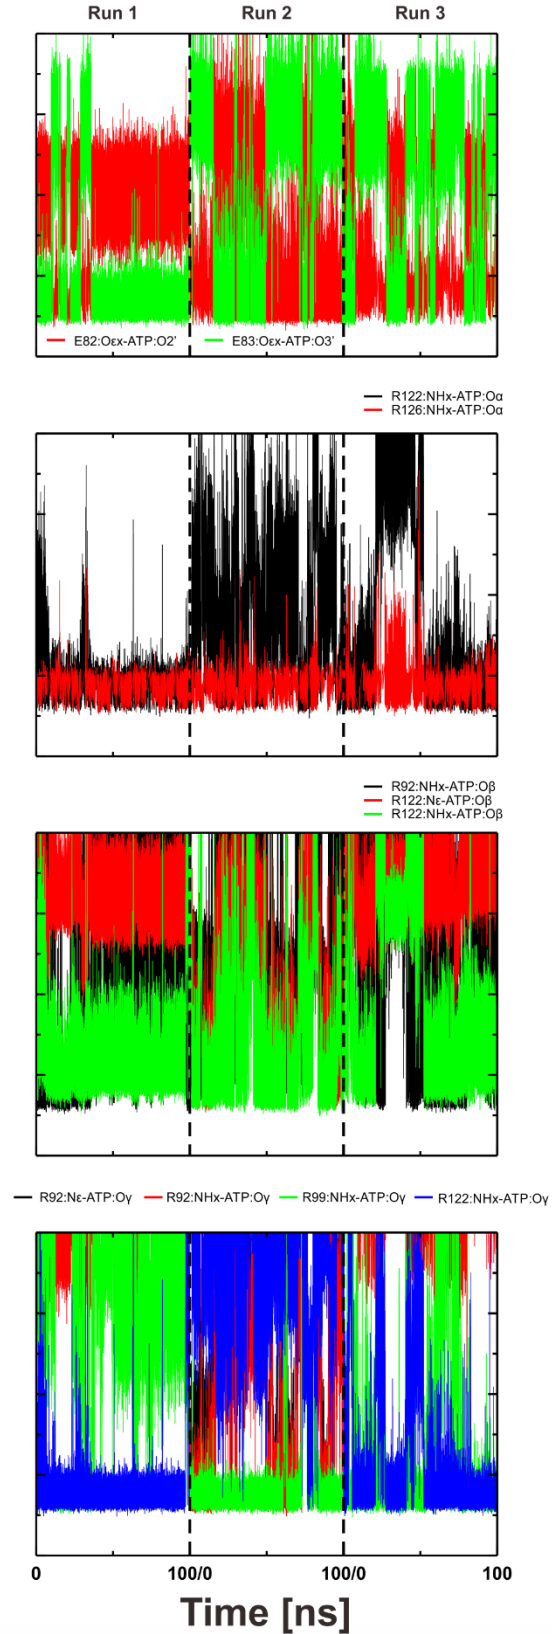

## R115A - ATP:O $\alpha$ /O $\beta$

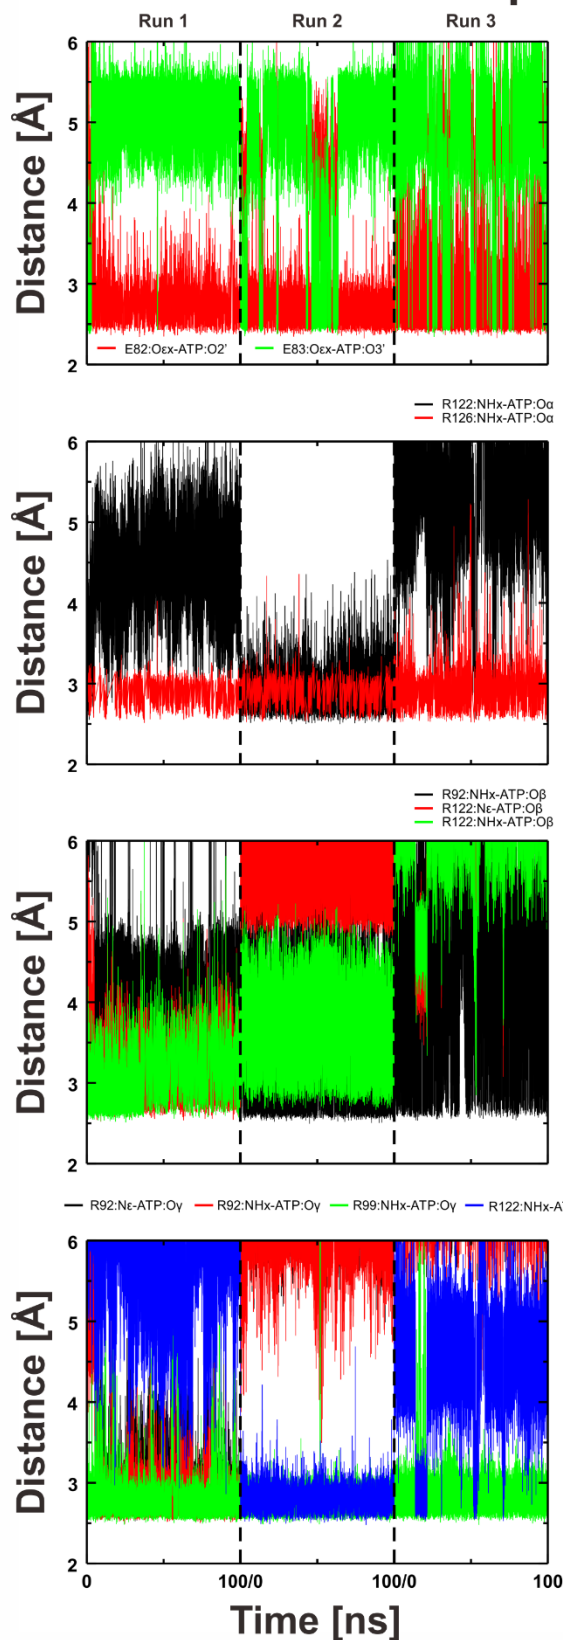

## R1153A - ATP:O $\beta$ /O $\gamma$

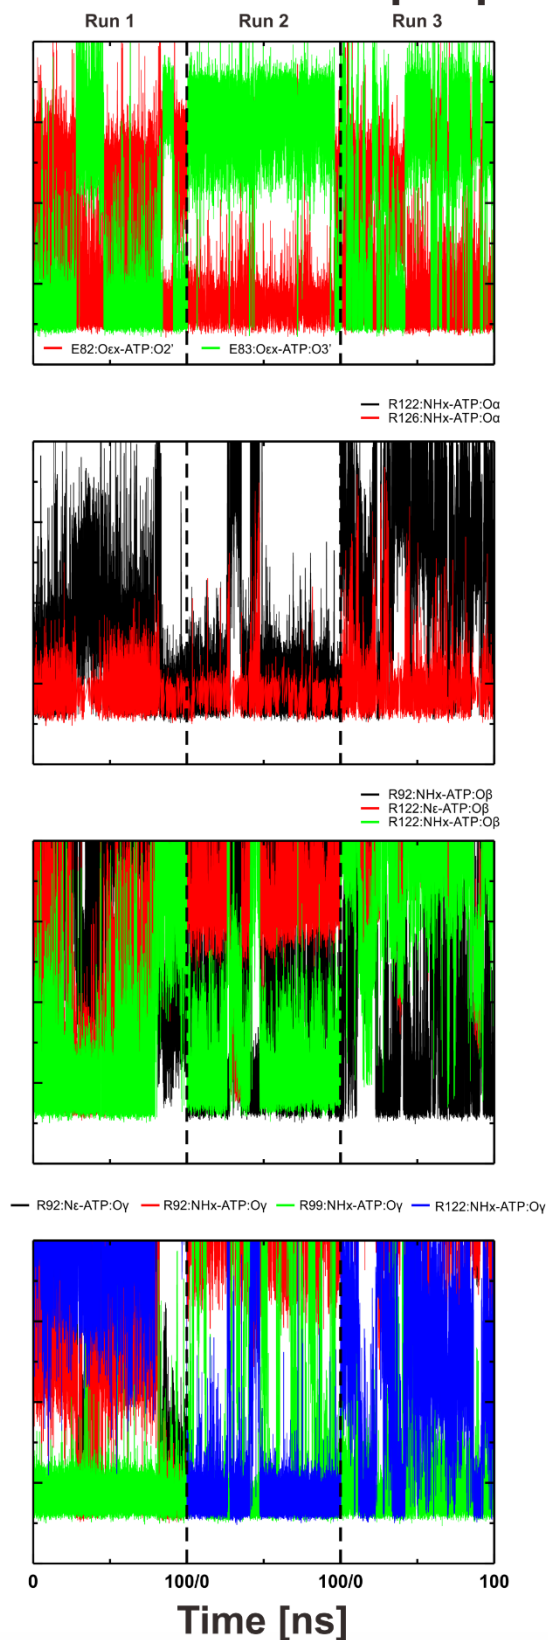

Figure S2: Timelines of relevant interactions of the R103A and R115A single mutants of the  $\epsilon$  subunit from thermophilic *Baillus* PS3. For each mutant the state in which  $Mg^{2+}$  is coordinated by ATP:O $\alpha$ /O $\beta$  and ATP:O $\beta$ /O $\gamma$  is shown on the left and right , respectively

## R103A

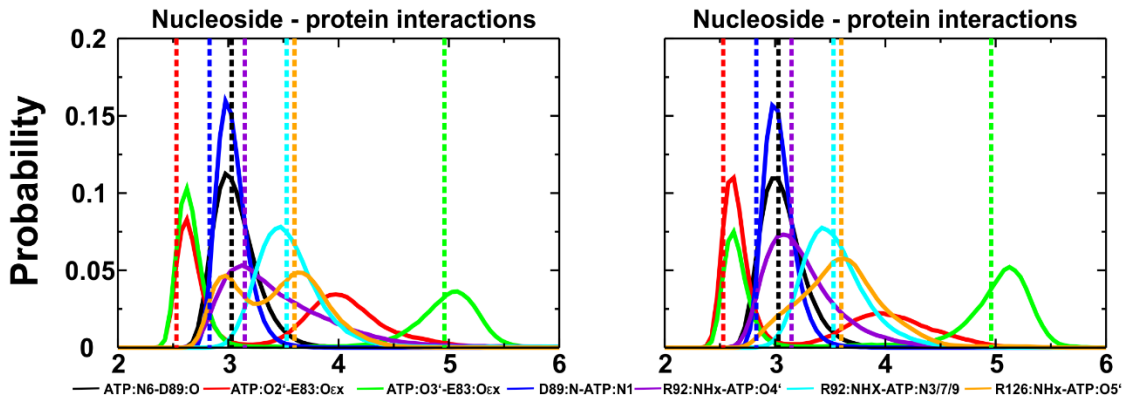

## R115A

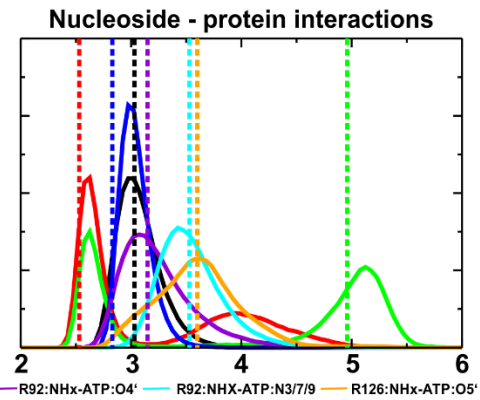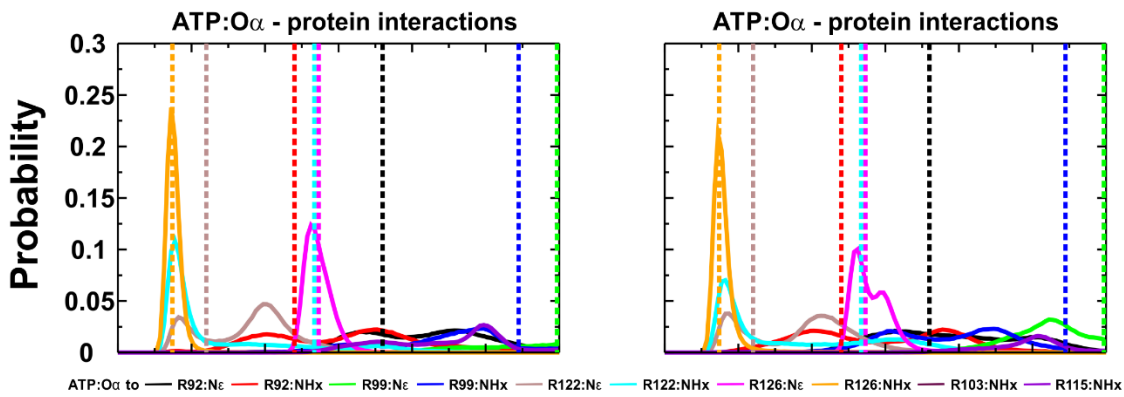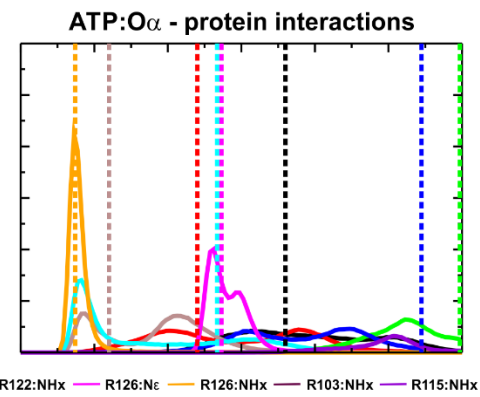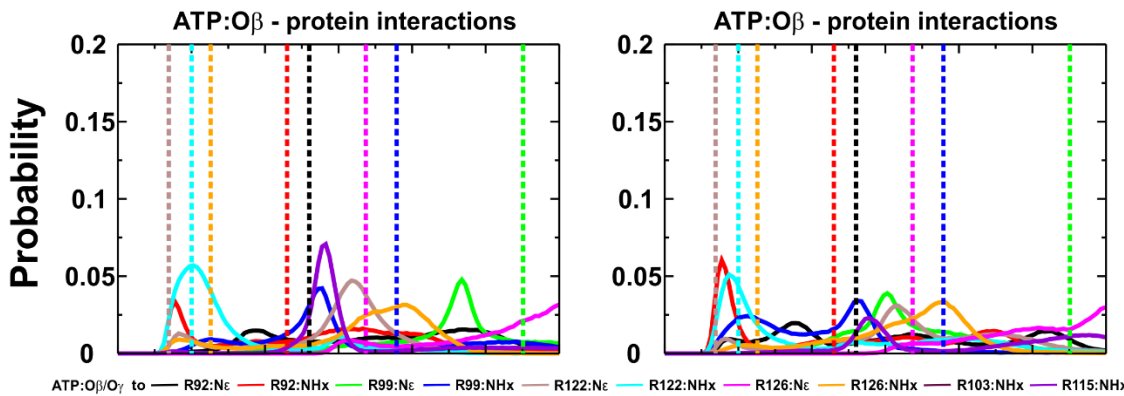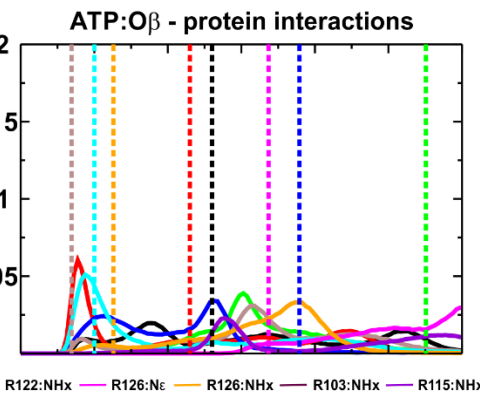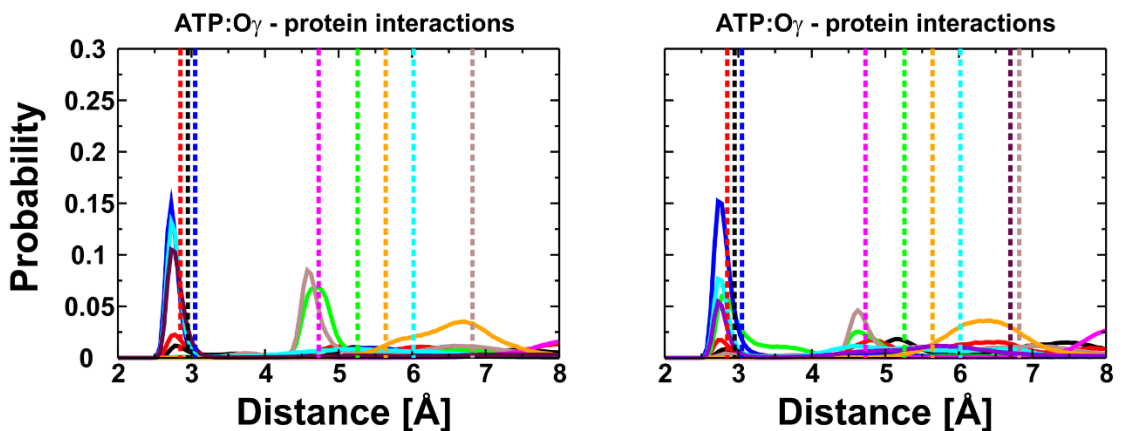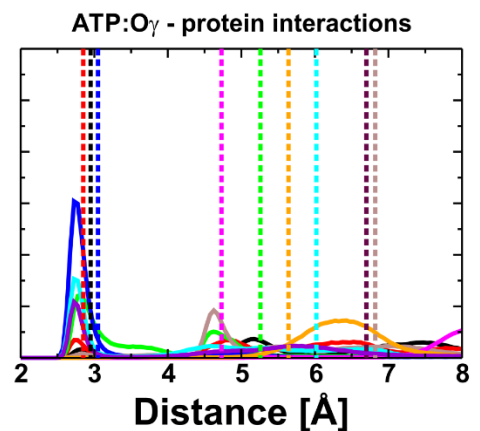



Figure S3: Interactions of the  $\epsilon$  subunit R103A (left) and R115A (right) mutants from thermophilic *Bacillus* PS3 with ATP during the simulations when  $Mg^{2+}$  is coordinated by ATP:O $\beta$ /O $\gamma$ . Dotted lines correspond to the distances observed in the crystal structure of the wild type protein.

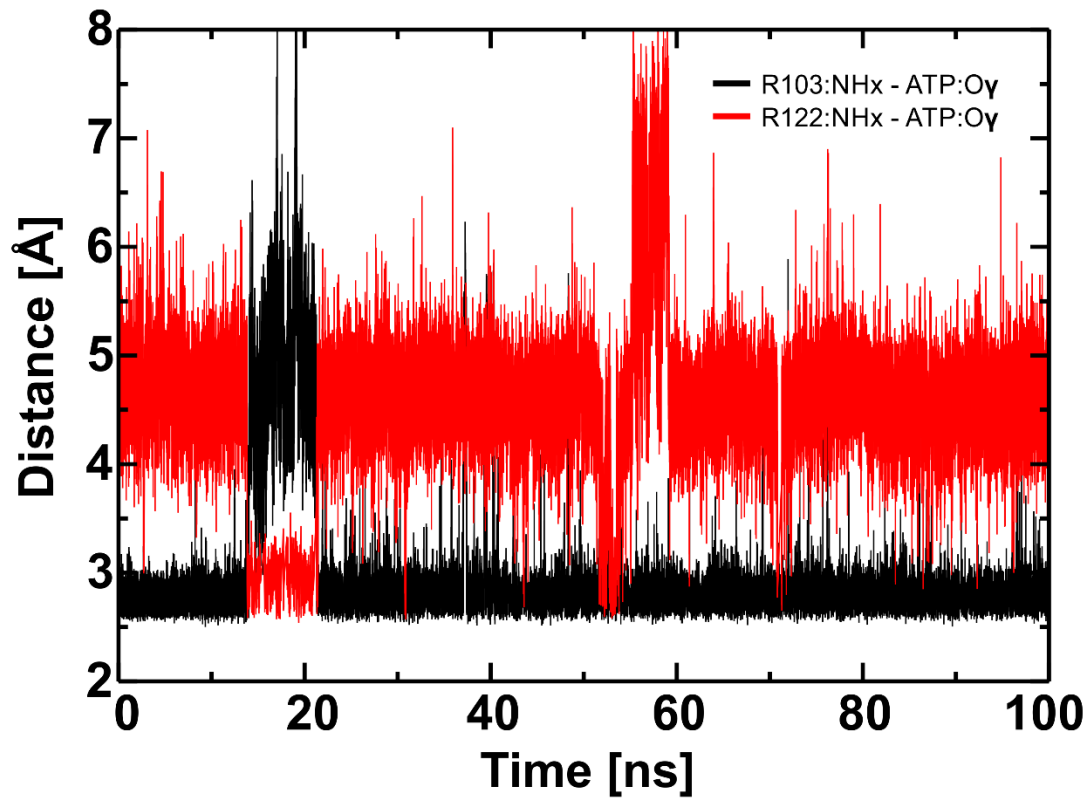

Figure S4: Interactions of R103:NHx (black) and R122:NHx (red) with ATP:O $\gamma$ , respectively of the excluded run of the R115A mutant. In this run, it can be observed that R103 binding to the ligand leads to a release of R122 interactions with ATP.

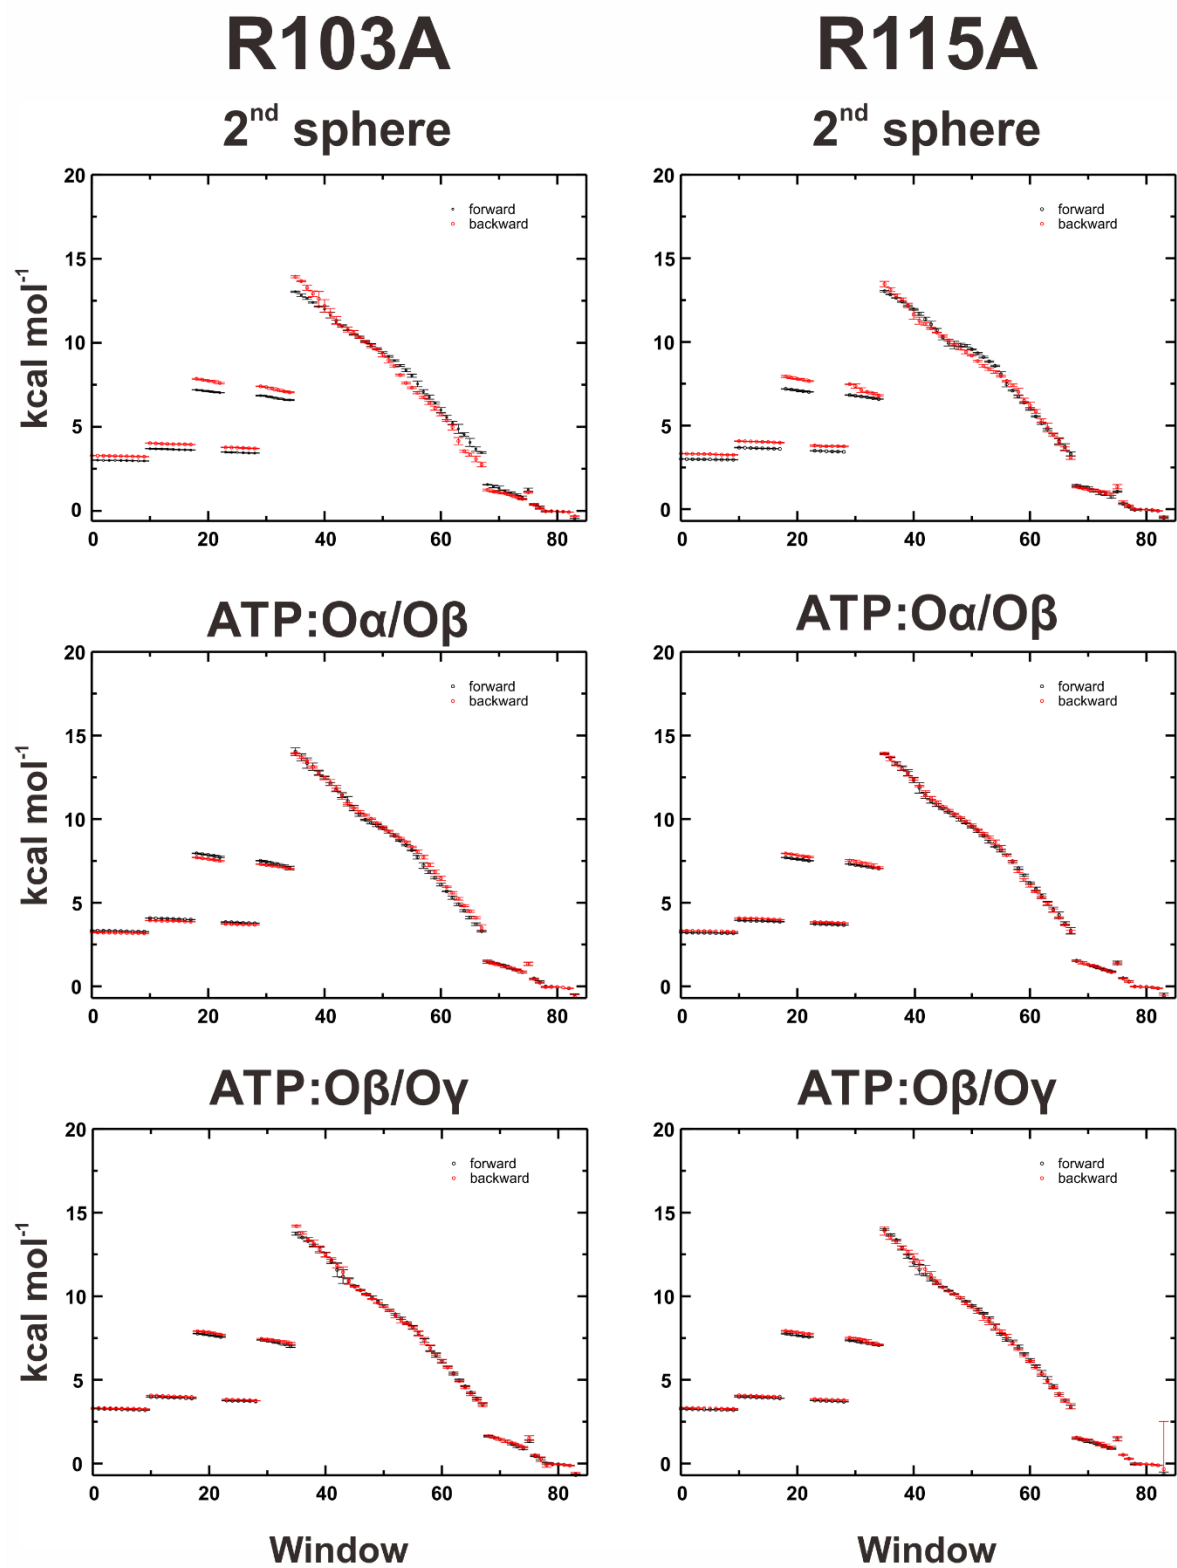

Figure S5: Energetic contributions of the single windows in both mutants for all TI calculations.

## R103A

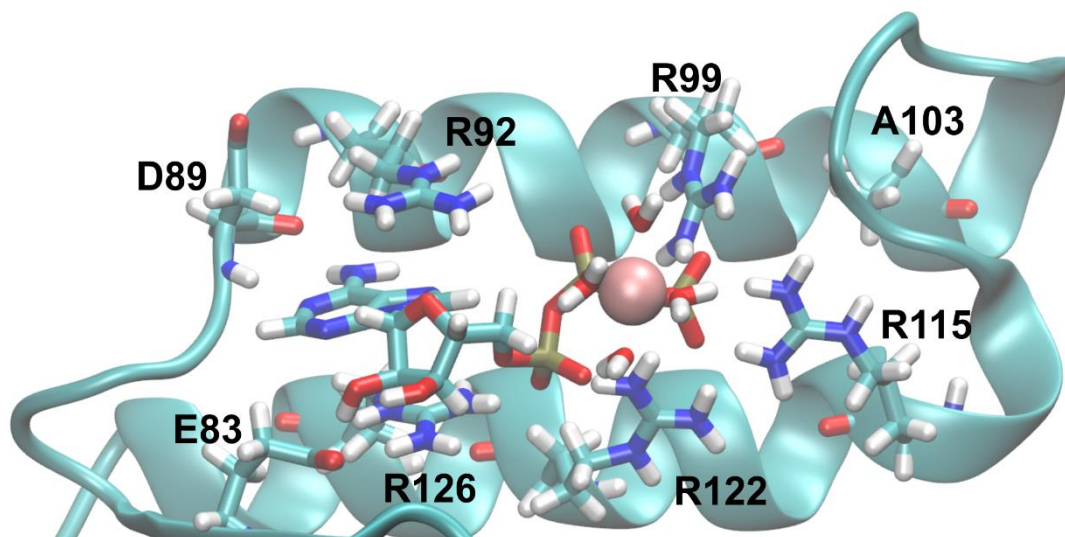

## R115A

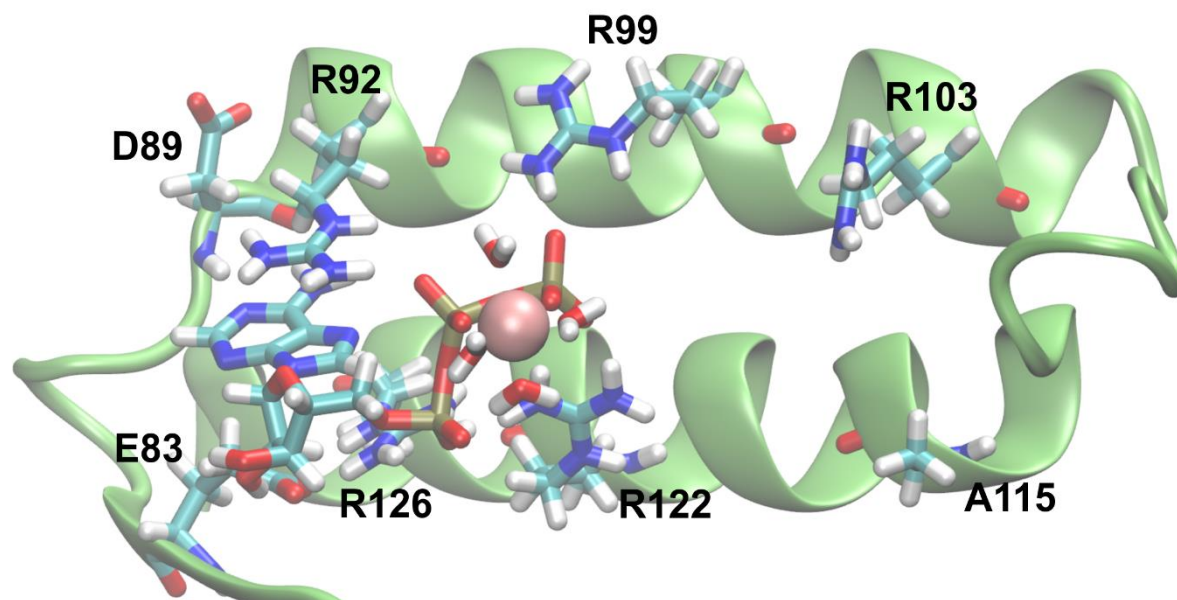

Figure S6: Predicted binding sites of the R103A and R115A mutants of the  $\epsilon$  subunit from thermophilic *Bacillus* PS3, in the hypothetical case if the ion is bound to ATP: $O\beta/O\gamma$ .
